# Supplementary material
Source: MDPI journal article supplement (https://www.mdpi.com/2311-5629/2/2/13)
Supplement: s1 [file s1]

# Supplementary Materials: Application of GUITAR on the Negative Electrode of the Vanadium Redox Flow Battery: Improved $V^{3+/2+}$ Heterogeneous Electron Transfer with Reduced Hydrogen Gassing

Humayun Kabir, Isaiah O. Gyan, Jeremy D. Foutch, Haoyu Zhu and I. Francis Cheng

## Calculation of “smooth” (or true) surface area of KFD graphite felt and GUITAR/KFD felt:

In regards to the Smith *et al.* [1] calculation method (Equations (1) to (3) therein) our values are given in the table below

**Table S1.** Values for calculation of “smooth” (or true) surface area of KFD graphite felt and GUITAR/KFD felt.

| Properties                                                                        | KFD Graphite Felt  | GUITAR/KFD Felt    |
|-----------------------------------------------------------------------------------|--------------------|--------------------|
| Density of the felt (g/cm <sup>3</sup> )                                          | 1.8 [1]            | 1.8 [1]            |
| Radius of the graphite fiber (μm)                                                 | 4.35               | 6.17               |
| Areal weight of the felt (g/cm <sup>2</sup> )                                     | 0.025 <sup>a</sup> | 0.034 <sup>b</sup> |
| Total volume of the graphite fiber (cm <sup>3</sup> ) ( $V_{gf} = m/d_{gf}$ )     | 0.014              | 0.019              |
| The equivalent length of the graphite fiber (cm) ( $V_{gf} = \pi r^2 L_{gf}$ )    | 23562.4            | 15894.7            |
| “Smooth” surface area of the felt (cm <sup>2</sup> ) ( $A_{gf} = 2\pi r L_{gf}$ ) | 64.4               | 61.6               |

<sup>a</sup> Reported by SGL Group, <sup>b</sup> Measured.

## Determination of electrochemical surface area of KFD graphite felt and GUITAR/KFD felt using Randles–Sevcik equation:

Randles-Sevcik equation for a reversible process is

$$sI_p = 268,600 n^{3/2} AC \sqrt{Dv}$$

where,  $I_p$  = Peak current (A)

$n$  = # of electron transferred in the redox process

$A$  = Electrochemical surface area of the electrode (cm<sup>2</sup>)

$C$  = Concentration of the redox species (mol/cm<sup>3</sup>)

$D$  = Diffusion constant of the redox species (cm<sup>2</sup>/s)

$v$  = Scan rate (V/s)

A plot of  $I_p$  vs  $\sqrt{v}$  gives slope which is equal to  $268,600 n^{3/2} AC \sqrt{D}$  from which the electrochemical surface area ( $A$ ) of the electrode can be calculated and shown in table S2. The  $I_p$  vs  $\sqrt{v}$  for both the KFD graphite felt and GUITAR coated KFD graphite felt electrode are shown in figure S1 (in 1 mM  $Fe(CN)_6^{3-/4-}$  in + 1 M KCl).

For  $Fe(CN)_6^{3-/4-}$ ,  $n = 1$ ,  $C = 1 \times 10^{-6}$  mol/cm<sup>3</sup> and  $D = 7.26 \times 10^{-6}$  cm<sup>2</sup>/s [2]. Both the felts were made hydrophilic using ethanol as described in Smith et al before use.

**Table S2.** Values for determination of electrochemical surface area of KFD graphite felt and GUITAR/KFD felt using Randles–Sevcik equation.

|                                                                                                                        | KFD Graphite Felt | GUITAR/KFD Felt |
|------------------------------------------------------------------------------------------------------------------------|-------------------|-----------------|
| Slope of the $I_p$ vs $\sqrt{v}$ plot                                                                                  | 0.0089            | 0.0055          |
| Electrochemical surface area of the felt (cm <sup>2</sup> )<br>(slope = $I_p/\sqrt{v} = 268,600 n^{3/2} AC \sqrt{D}$ ) | 12.3              | 7.6             |
| Geometric area of the felt (cm <sup>2</sup> )                                                                          | 0.20              | 0.15            |
| Electrochemical surface area of the<br>felt/cm <sup>2</sup> of geometric area (cm <sup>2</sup> )                       | 61.5              | 50.6            |

### Scan rate variations on KFD graphite felt and GUITAR/KFD felt:

To distinguish between finite-length (thin-layer) and semi-infinite diffusion behavior on the felt electrodes. Cyclic voltammetry of 1 mM  $\text{Fe}(\text{CN})_6^{3-/4-}$  (in 1 M KCl) was performed at potential sweep rates ( $v$ ) between 0.01 to 0.6 V/s (Figure S1). Figure S2 provides the analysis. Thin-layer behavior gives an peak current ( $I_p$ )  $\propto v$  (see Equation (11.7.17) [3]), whereas semi-infinite linear diffusion gives  $I_p \propto v^{1/2}$  (Equation (6.3.8) [3]). At 200 mV/s the current was found to be within the  $v$  region where semi-infinite linear diffusion predominates to the electrode surface.

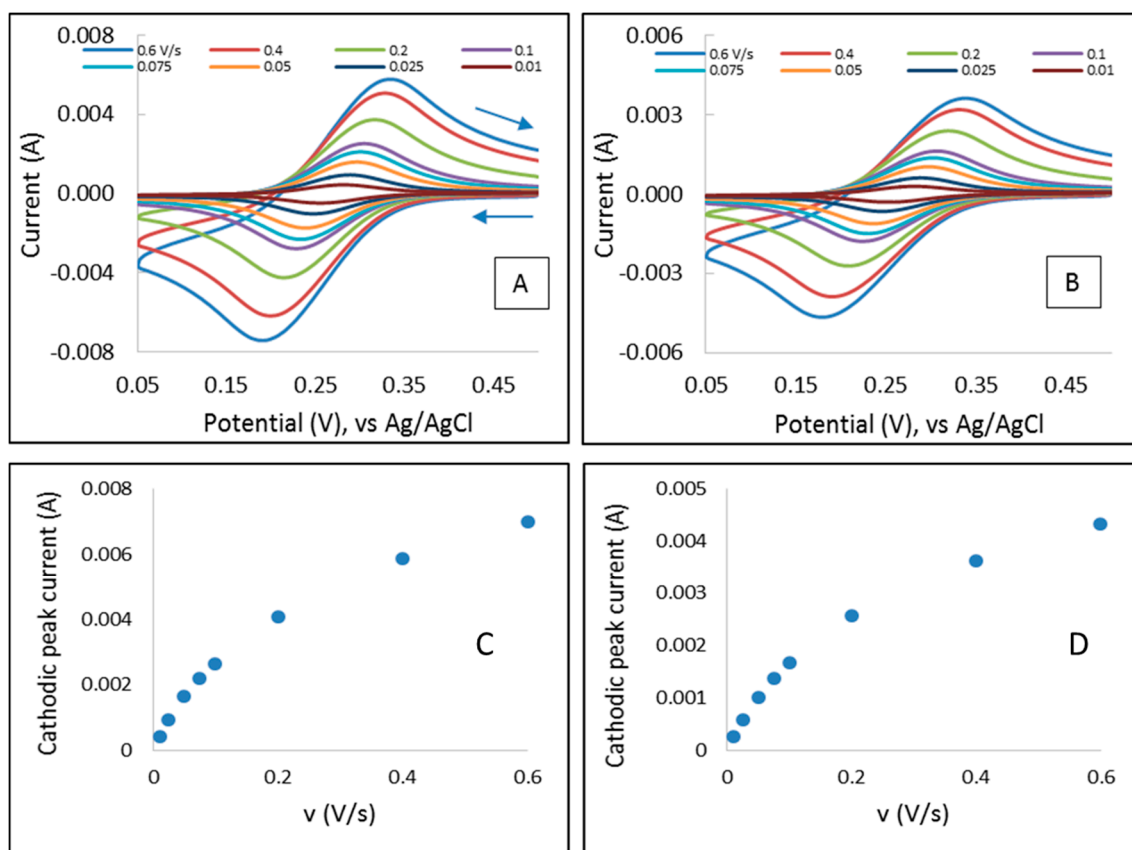

**Figure S1.** Cyclic Voltammetric scan rate variation on in 1 mM  $\text{Fe}(\text{CN})_6^{3-/4-}$  (in 1 M KCl) at 0.6, 0.4, 0.2, 0.1, 0.075, 0.05, 0.025 and 0.01 V/s. (A) on KFD felt electrode and the corresponding  $I_p$  vs  $v$  (C). (B) on GUITAR/KFD felt electrode and the corresponding  $I_p$  vs  $v$  (D).

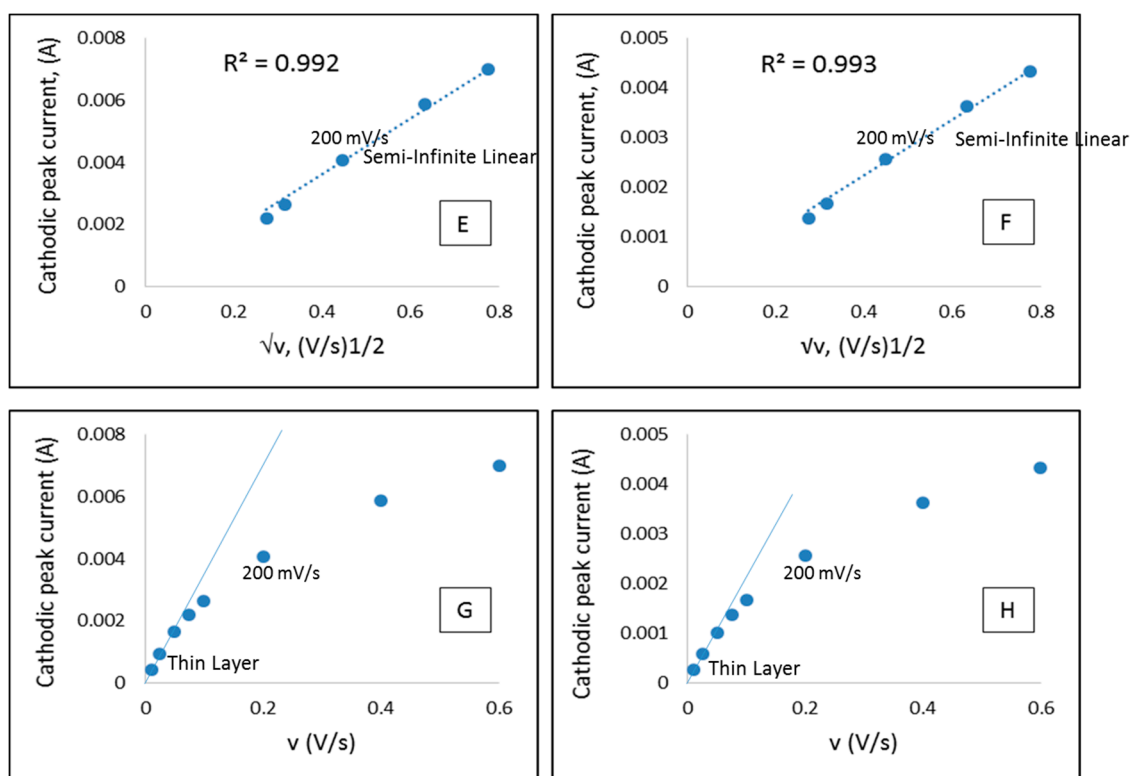

**Figure S2.** Analysis of cyclic voltammetric peak currents of Figure S1 for thin layer *vs.* semi-infinite linear diffusion characteristics. (E)  $I_p$  *vs.*  $v^{1/2}$  on KFD felt electrode, (F)  $I_p$  *vs.*  $v^{1/2}$  on GUITAR/KFD felt. (G)  $I_p$  *vs.*  $v$  on KFD felt electrode, (H)  $I_p$  *vs.*  $v$  on GUITAR/KFD felt. Thin-layer cell characteristics were found to predominate below 50 mV/s (see Plots G and H). Semi-infinite linear diffusion were found to predominate over 0.075 V/s (see Plots E and F).

### Working electrode set-up:

Figure S3 shows the working electrode set-up

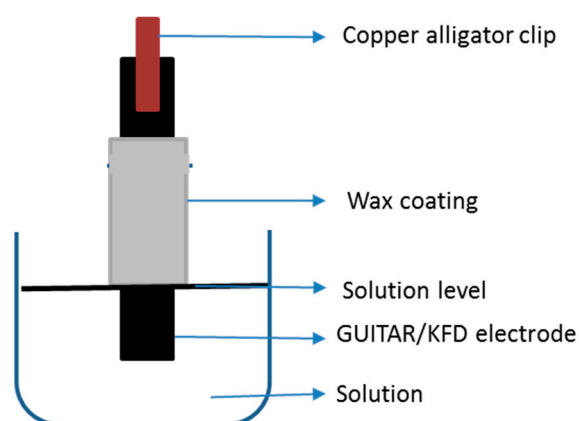

**Figure S3.** Working electrode set up.

### Reference

1. Smith, R.E.G.; Davies, T.J.; Baynes, N.d.; Nichols, R.J. The electrochemical characterisation of graphite felts. *J. Electroanal. Chem.* **2015**, *747*, 29–38.
2. Konopka, S.J.; McDuffie, B. Diffusion Coefficients of Ferri- and Ferrocyanide Ions in Aqueous Media, Using Twin-Electrode Thin-layer Electrochemistry. *Anal. Chem.* **1970**, *42*, 1741–1746.
3. Bard, A.J.; Faulkner, L.R. *Electrochemical Methods: Fundamentals and Applications*, 2nd ed.; John Wiley and Sons: New York, NY, USA, 2001.
